# Supplementary material for: Revealing the Na storage behavior of graphite anodes in low-concentration imidazole-based electrolytes
Source: Royal Society of Chemistry journal article supplement (doi:10.1039/d3sc06640a), 2024-01-01
Supplement: d3sc06640a1.pdf [file d3sc06640a1.pdf]

## Supporting Information

### Revealing the Na Storage Behavior of Graphite Anode in Low-Concentration Imidazole-Based Electrolyte

*Wei Zhao,<sup>a</sup> Chunting Wang,<sup>a</sup> Zhenjie Cheng,<sup>a</sup> Cheng Zheng,<sup>a</sup> Qian Yao,<sup>a</sup> Jun Pan,<sup>\*b</sup>*

*Xiaojian Ma<sup>\*a</sup> and Jian Yang<sup>a</sup>*

<sup>a</sup>Key Laboratory of Colloid and Interface Chemistry Ministry of Education School of Chemistry and Chemical Engineering, Shandong University, Jinan 250100, P. R. China

<sup>b</sup>School of Physical and Mathematical Sciences, Nanyang Technological University,

Singapore 637371, Singapore

\*Corresponding authors.

Email: jun.pan@ntu.edu.sg; maxj@sdu.edu.cn.

# Content

|                                      |           |
|--------------------------------------|-----------|
| <b>1. Experimental Section .....</b> | <b>4</b>  |
| Materials.....                       | 4         |
| Materials characterization.....      | 4         |
| Electrochemical measurements .....   | 4         |
| Calculation methods.....             | 5         |
| <b>2. Supplementary Figures.....</b> | <b>6</b>  |
| Figure S1 .....                      | 6         |
| Figure S2 .....                      | 7         |
| Figure S3 .....                      | 8         |
| Figure S4 .....                      | 8         |
| Figure S5 .....                      | 9         |
| Figure S6 .....                      | 9         |
| Figure S7 .....                      | 10        |
| Figure S8 .....                      | 10        |
| Figure S9 .....                      | 11        |
| Figure S10 .....                     | 11        |
| Figure S11 .....                     | 12        |
| Figure S12 .....                     | 12        |
| Figure S13 .....                     | 13        |
| Figure S14 .....                     | 13        |
| Figure S15 .....                     | 14        |
| Figure S16 .....                     | 14        |
| <b>3. Supplementary Tables.....</b>  | <b>15</b> |
| Table S1 .....                       | 15        |
| Table S2 .....                       | 15        |
| Table S3. ....                       | 16        |
| <b>References.....</b>               | <b>17</b> |

# 1. Experimental Section

**Materials:** All chemicals were purchased commercially and were not purified. All electrolytes were prepared in an Ar-filled glove box ( $O_2 < 0.1$  ppm and  $H_2O < 0.1$  ppm).

**Materials characterization:** X-ray diffraction (XRD) patterns were obtained from a diffractometer (Rigaku, SmartLab, Japan) with Cu  $K\alpha$  as radiation ( $\lambda = 1.5418$  Å). Scanning electron microscope (SEM) images were performed on a field-emission scanning microscope (Zeiss Gemini 300, Germany). Raman spectra were characterized on a micro-Raman spectrometer (Horiba JY Lab RAM HD88, Japan) with an excitation of 532 nm. High-resolution transmission electron microscope (HRTEM) images were acquired by a transmission electron microscope (JEOL JEM-2100F). X-ray photoelectron spectra (XPS) were measured on an X-ray photoelectron spectrometer (ESCALAB 250Xi+, Thermo Fischer, USA) using Al  $K\alpha$  radiation. Fourier-transform infrared (FT-IR) spectra were recorded using an infrared spectrometer (Bruker Tensor II, Germany). The viscosity was tested on a viscosity meter (KEJING STAR, MSK-SFM-VT8S, China). The ionic conductivity was measured on an ionic conductivity meter (LEICI, DDSJ-308F, China).  $^{13}C$  NMR nuclear magnetic resonance spectra were measured on an AVANCE III HD 400 spectrometer (AVANCE NEO, Bruker, Germany) and d-DMSO was used as the solvent.

**Electrochemical measurements:** The mesophase carbon microbeads (MCMB) anode was fabricated by mixing MCMB powder and sodium alginate in a weight ratio of 9:1 with water as solvent.  $NaTi_2(PO_4)_3/C$  (NTP/C) was prepared using the reported method.<sup>1</sup> The NTP/C cathode was made of NTP/C powder, acetylene black, and polyvinylidene fluoride mixed in a weight ratio of 8:1:1, using 1-methyl-2-pyrrolidone as the solvent. The above slurry was ball milled for 4 hours, spread on the current collector (Cu or Al), and vacuum dried at 70°C for 12 h. Then it was cut into disks with a diameter of 12 mm, using Na metal as the counter electrode of the half-cell and NTP/C as the counter electrode of the full-cell. The active mass loading of the anode electrode is 1.3 mg  $cm^{-2}$  and the N/P = 1.2:1 with pre-lithiation (where N/P is the

capacity ratio of the anode to the cathode). The CR2032-type coin cells for galvanostatic discharge/charge were assembled in an argon-filled glove box (Mikrouna, Super 1220/750/900, H<sub>2</sub>O<1 ppm, O<sub>2</sub><1 ppm) with glass fiber (Whatman GF/F) as the separator and 100 μL electrolyte in each cell. Galvanostatic discharge/charge profiles were tested on a battery-testing system (Land CT2001A, China) within 0.01-2.0 V/1.2-2.3 V. Cyclic voltammetry (CV) curves were collected on an electrochemical workstation (CHI 760E, China) within 0.01-2.0 V at the scanning of 0.15 mV s<sup>-1</sup>. Electrochemical impedance spectra (EIS) and linear sweep voltammetry (LSV) curves were measured on an electrochemical workstation (Autolab PGSTAT302N, Switzerland).

**Calculation methods:** The binding energies between Na<sup>+</sup> and different solvents were evaluated using density functional theory (DFT),<sup>2</sup> which was operated using the Gaussian 16 package based on the Becke's three-parameter hybrid method with the Lee-Yang-Parr correlation functional (B3LYP) and the 6-311\*G(d,p) basis set.<sup>3</sup> The minimum values of electrostatic potential (ESP<sub>min</sub>) were calculated at the B3LYP/6-311G\*(d,p) level with Multiwfn software. The solvents-Na<sup>+</sup> binding energies (E<sub>b</sub>) were evaluated as follows:

$$E_b = E_{\text{sol-Na}^+} - E_{\text{sol}} - E_{\text{Na}^+}$$

Where E<sub>sol</sub>, E<sub>Na<sup>+</sup></sub>, and E<sub>sol-Na<sup>+</sup></sub> are the energies of the solvents, Na<sup>+</sup>, and the solvent -Na<sup>+</sup> complex, respectively.

## 2. Supplementary Figures

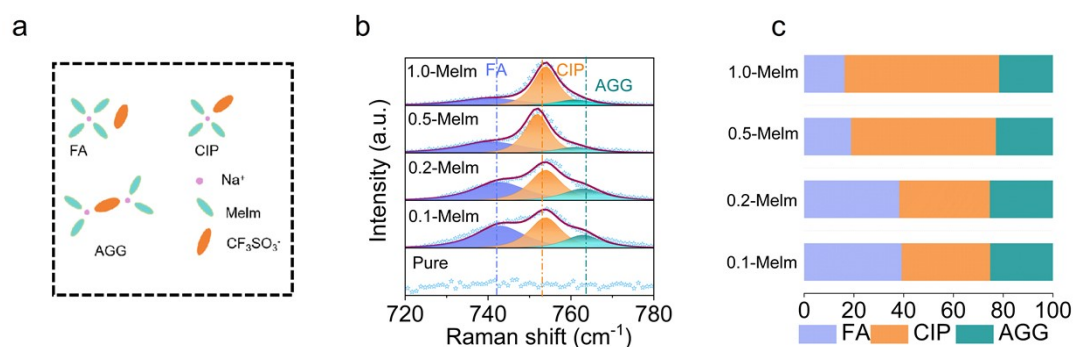

**Figure S1.** (a) Different combination forms of anions and cations of Na<sup>+</sup>-CF<sub>3</sub>SO<sub>3</sub><sup>-</sup>. (b) Raman spectra of Melm-based electrolytes at different salt concentrations (NaCF<sub>3</sub>SO<sub>3</sub>). (c) The proportion of different combination forms of anions and cations in 0.2-Melm.

Raman spectra were detected to explore the solvation structure at different salt concentrations. The peaks located at 700-780 cm<sup>-1</sup> are divided into free CF<sub>3</sub>SO<sub>3</sub><sup>-</sup> anion (FA), contact ion pairs (CIP, CF<sub>3</sub>SO<sub>3</sub><sup>-</sup> coordinating to one Na<sup>+</sup>), and aggregate (AGG, CF<sub>3</sub>SO<sub>3</sub><sup>-</sup> coordinating to more Na<sup>+</sup>).<sup>4</sup> Compared with 0.5-Melm and 1.0-Melm, the solvation structures of 0.1-Melm and 0.2-Melm have more FA coordination, indicating Na<sup>+</sup> is encapsulated by the solvent in almost all directions. This is considered the most favorable structure and can effectively alleviate the adverse forces between Na and graphite.

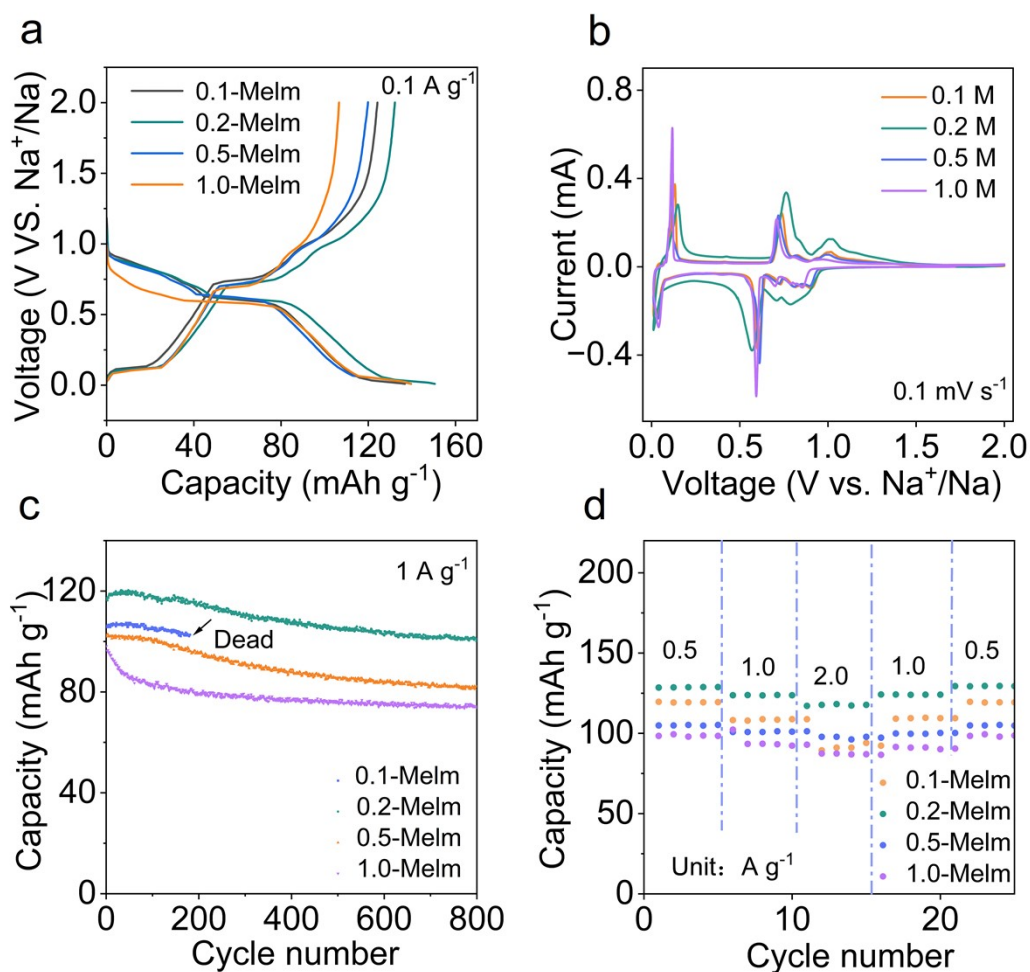

**Figure S2.** The electrochemical performance of MCMB anodes in Melm-based electrolytes at different concentrations. (a) Galvanostatic discharge/charge profiles. (b) CV curves. (c) Long-term cycling performances. (d) Rate performances.

Figure S2a shows that the MCMB anode has a high specific capacity of 150.5 mAh g<sup>-1</sup> at 0.1 A g<sup>-1</sup> with 0.2-Melm as electrolyte. Besides, Figure S2c illustrates that the MCMB anode using 0.2-Melm exhibits 100.8 mAh g<sup>-1</sup> with a capacity retention of 86.4% after 800 cycles at 1 A g<sup>-1</sup>. It also remains the superior capacity of 100.2 mAh g<sup>-1</sup> at 2 A g<sup>-1</sup> (Figure S2d). These data indicates that 0.2-Melm is the most ideal electrolyte at various salt concentrations.

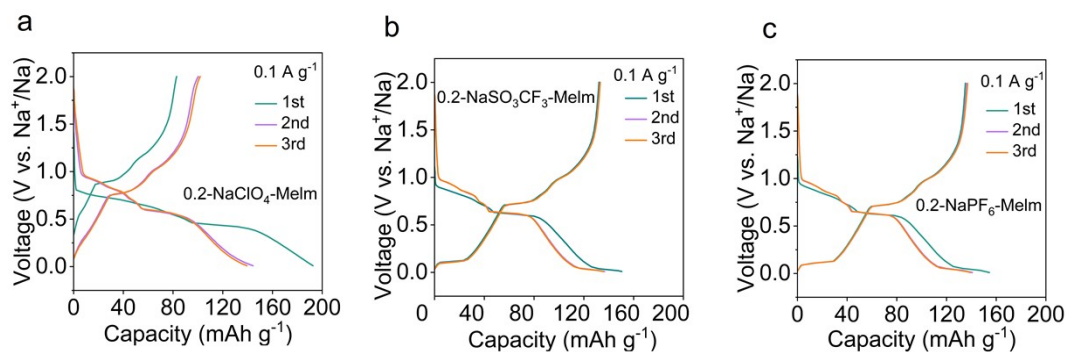

**Figure S3.** Galvanostatic discharge/charge profiles of MCMB anodes in different electrolytes at  $0.1 \text{ A g}^{-1}$ . (a)  $0.2\text{-NaClO}_4\text{-Melm}$ , (b)  $0.2\text{-NaCF}_3\text{SO}_3\text{-Melm}$ , (c)  $0.2\text{-NaPF}_6\text{-Melm}$ .

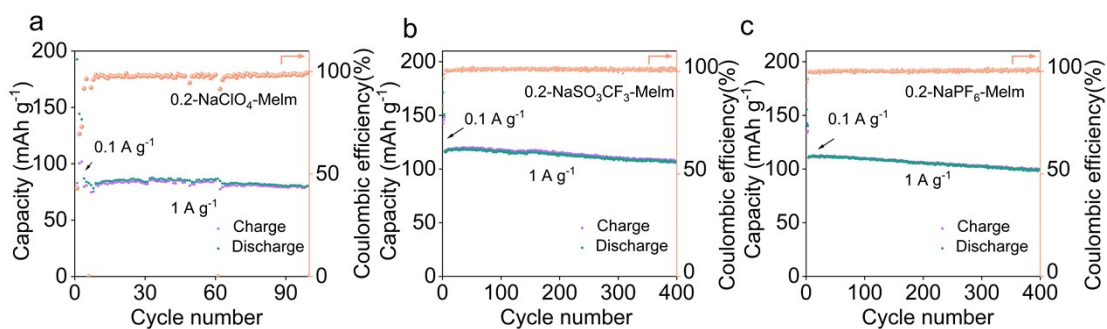

**Figure S4.** Long-term cycling performances of MCMB anodes in different electrolytes at  $0.1 \text{ A g}^{-1}$ . (a)  $0.2\text{-NaClO}_4\text{-Melm}$ , (b)  $0.2\text{-NaCF}_3\text{SO}_3\text{-Melm}$ , (c)  $0.2\text{-NaPF}_6\text{-Melm}$ .

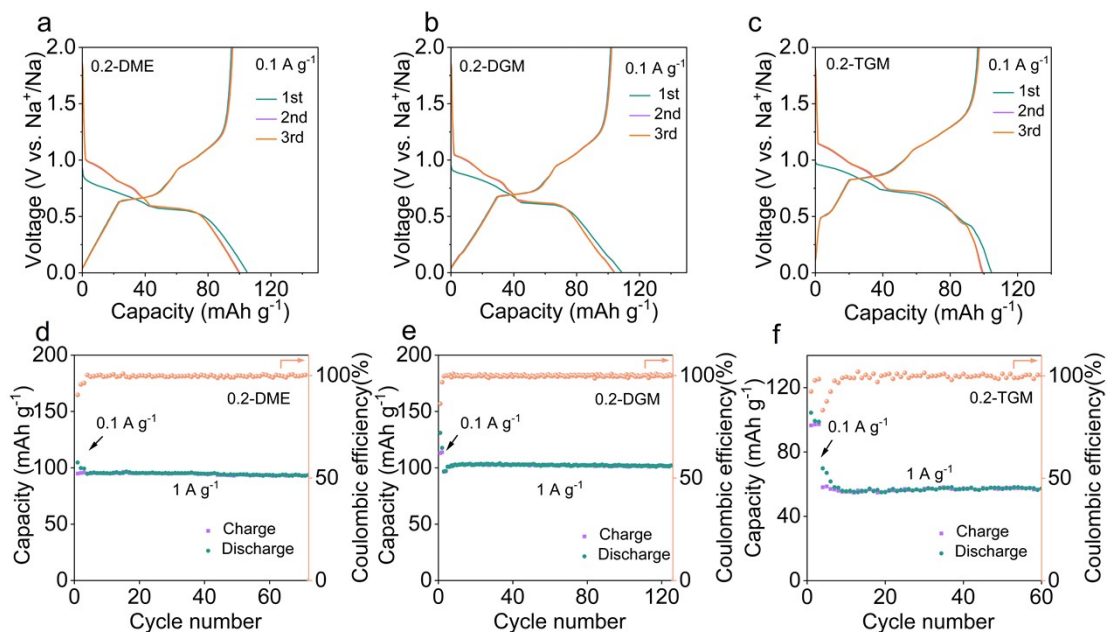

**Figure S5.** Electrochemical performance of MCMB anodes in ether-based electrolytes. Galvanostatic discharge/charge profiles in (a) 0.2-DME, (b) 0.2-DGM, and (c) 0.2-TGM. Long-term cycling performances in (d) 0.2-DME, (e) 0.2-DGM, and (f) 0.2-TGM.

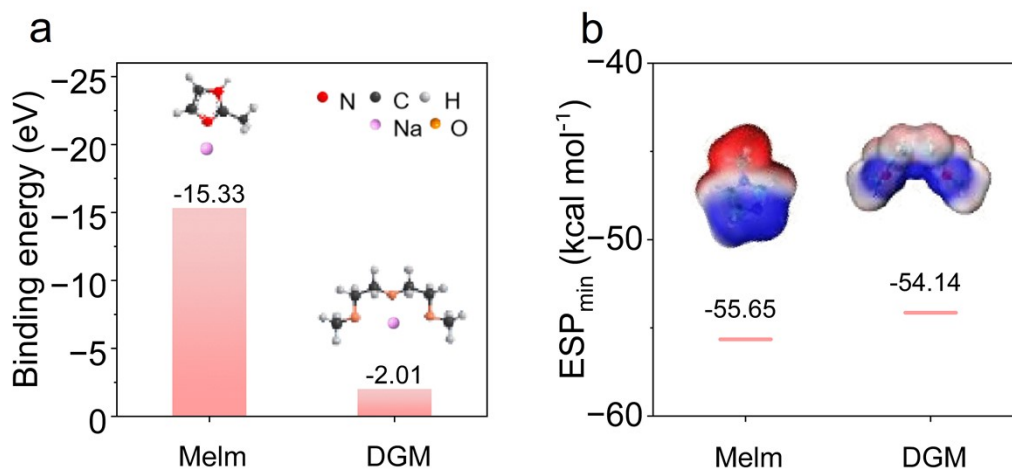

**Figure S6.** (a) The binding energy of  $\text{Na}^+$  and different solvents. (b) Calculated minimum electrostatic potentials ( $\text{ESP}_{\min}$ ) of different solvents.



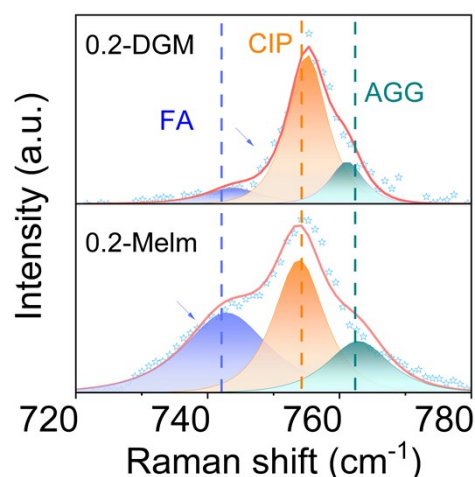

**Figure S7.** Different combination forms of anions and cations in 0.2-DGM and 0.2-Melm.

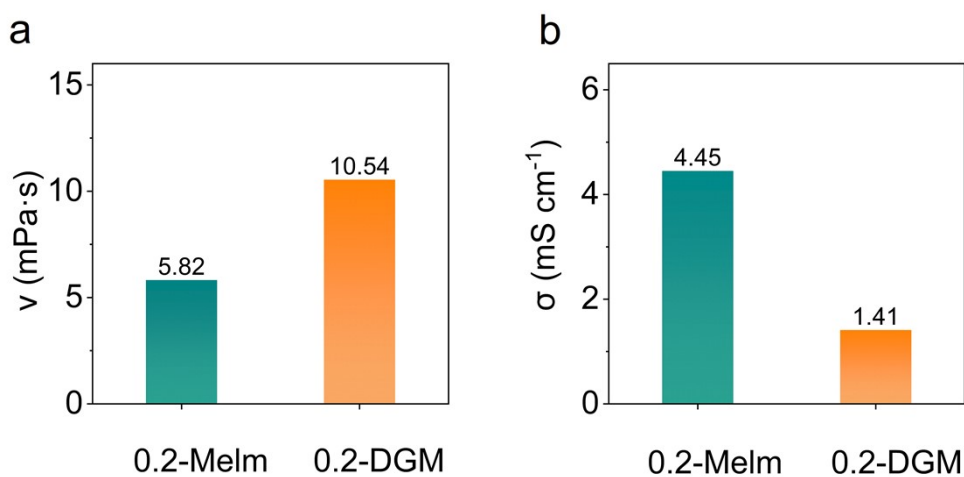

**Figure S8.** (a) The viscosity and (b) the ionic conductivity of 0.2-Melm and 0.2-DGM.

As calculated, the binding energy of Na<sup>+</sup> and Melm is -15.33 eV, which is much larger than -2.01 eV of Na<sup>+</sup> and DGM (Figure S6a). The ESP<sub>min</sub> of Melm is lower than that of DGM (Figure S6b). Compared with 0.2-DGM, 0.2-Melm has a higher proportion of FA in Na<sup>+</sup>-PF<sub>6</sub><sup>-</sup> coordination (Figure S7). Figure S8a and Figure S8b show that 0.2-Melm exhibits lower viscosity and higher ionic conductivity than 0.2-DGM.

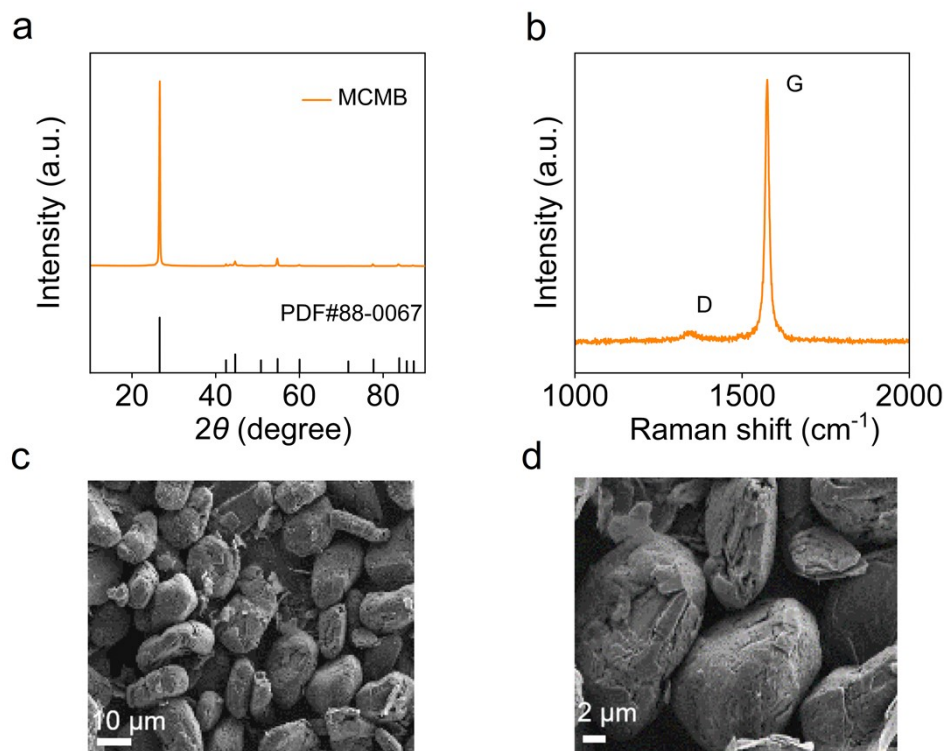

**Figure S9.** Properties of MCMB. (a) XRD pattern. (b) Raman spectra. (c,d) SEM images.

The strong peak located at  $26.83^\circ$  in XRD pattern can be directly assigned to the (002) lattice plane (Figure S9a). The Raman spectrum of MCMB shows a higher proportion of G bands, indicating a higher degree of graphitization (Figure S9b). SEM images revealed that the size of MCMB is around  $20\ \mu\text{m}$  (Figure S9c and Figure S9d).

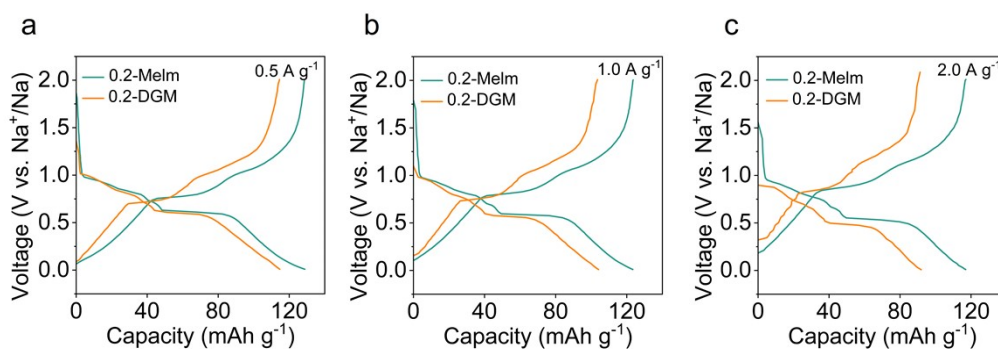

**Figure S10.** Galvanostatic discharge/charge profiles of MCMB anode in 0.2-Melm and 0.2-DGM at different current densities. (a)  $0.5\ \text{A g}^{-1}$ . (b)  $1.0\ \text{A g}^{-1}$ . (c)  $2.0\ \text{A g}^{-1}$ .

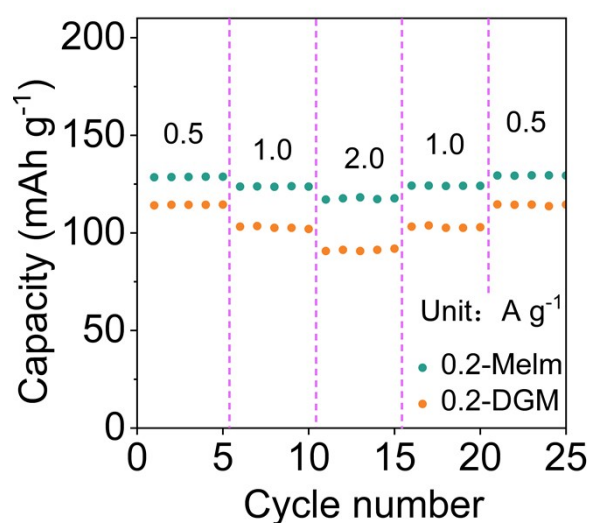

**Figure S11.** Rate performances of MCMB electrodes in 0.2-Melm and in 0.2-DGM.

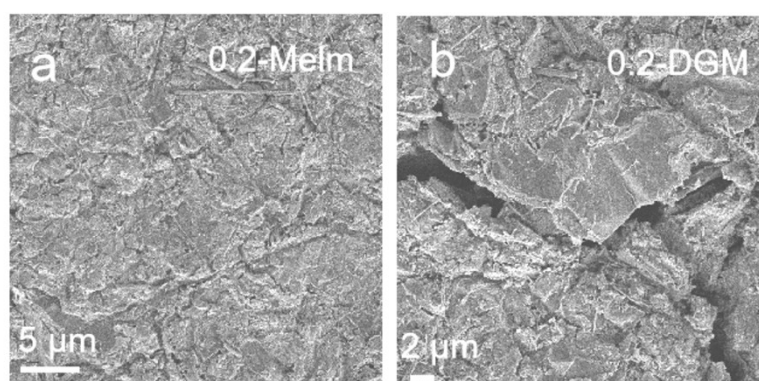

**Figure S12.** SEM images of MCMB anodes in 0.2-Melm (a) and in 0.2-DGM (b) after 100 cycles.

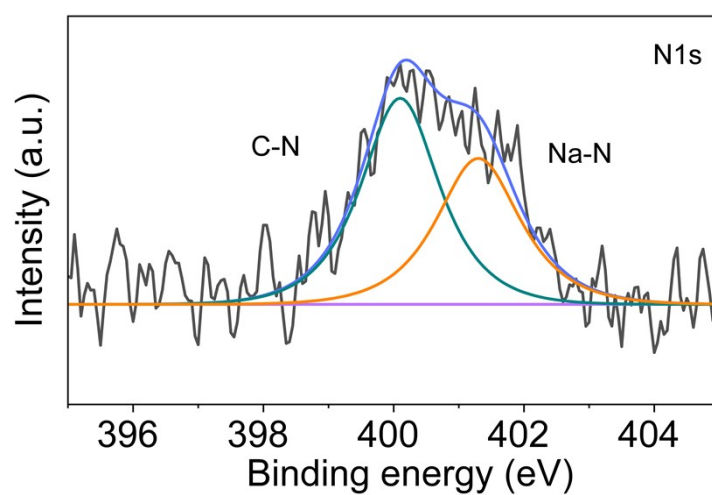

**Figure S13.** N 1s spectra of MCMB in 0.2-Melm after discharge.

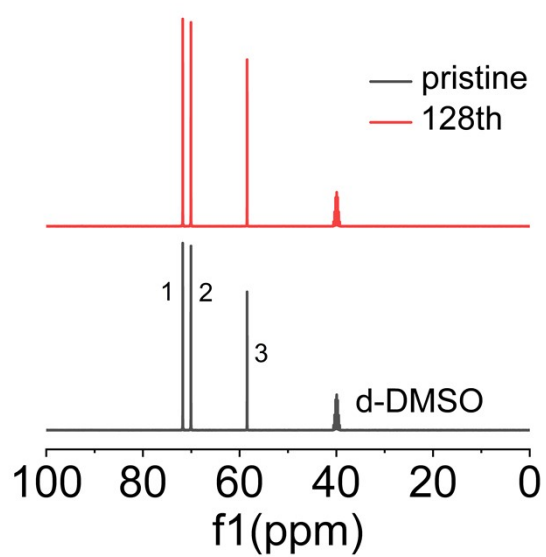

**Figure S14.** <sup>13</sup>C NMR of 0.2-DGM before cycling and after 128 cycles.

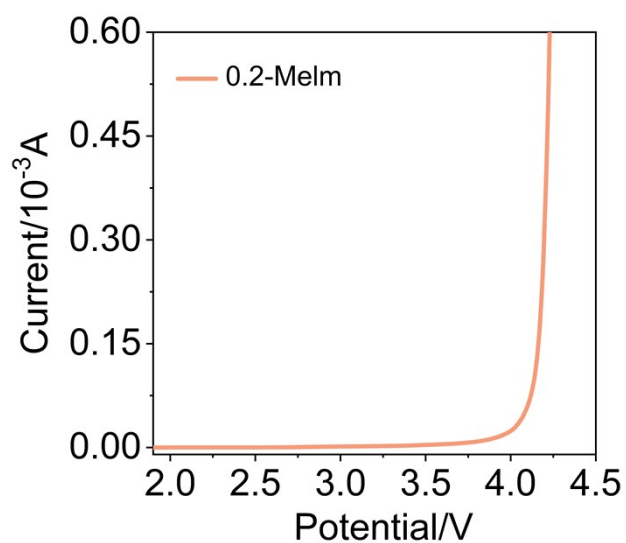

**Figure S15.** LSV curve of 0.2-Melm.

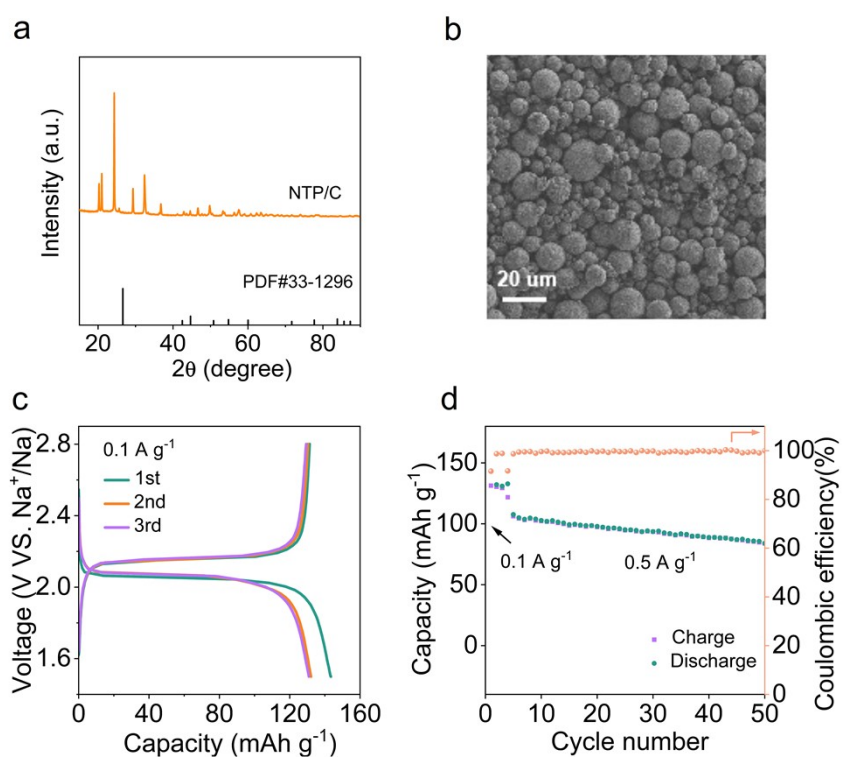

**Figure S16.** Properties and electrochemical performances of NTP/C. (a) XRD pattern. (b) SEM image. (c) Galvanostatic charge/discharge curves at  $0.1 \text{ A g}^{-1}$ . (d) Cycling performance at  $0.5 \text{ A g}^{-1}$ .

### 3. Supplementary Tables

**Table S1.** Compositions of the electrolytes studied in this work.

| Electrolyte                  | Salt                              | Amount of salt (mmol) | Solvent | Amount of solvent (ml) |
|------------------------------|-----------------------------------|-----------------------|---------|------------------------|
| 0.1-Melm                     | NaCF <sub>3</sub> SO <sub>3</sub> | 0.1                   | Melm    | 1                      |
| 0.2-Melm                     | NaCF <sub>3</sub> SO <sub>3</sub> | 0.2                   | Melm    | 1                      |
| 0.5-Melm                     | NaCF <sub>3</sub> SO <sub>3</sub> | 0.5                   | Melm    | 1                      |
| 1.0-Melm                     | NaCF <sub>3</sub> SO <sub>3</sub> | 1.0                   | Melm    | 1                      |
| 0.2-NaClO <sub>4</sub> -Melm | NaClO <sub>4</sub>                | 0.2                   | Melm    | 1                      |
| 0.2-NaPF <sub>6</sub> -Melm  | NaPF <sub>6</sub>                 | 0.2                   | Melm    | 1                      |
| 0.2-PrIm                     | NaCF <sub>3</sub> SO <sub>3</sub> | 0.2                   | PrIm    | 1                      |
| 0.2-Bulm                     | NaCF <sub>3</sub> SO <sub>3</sub> | 0.2                   | Bulm    | 1                      |
| 0.2-DME                      | NaCF <sub>3</sub> SO <sub>3</sub> | 0.2                   | DME     | 1                      |
| 0.2-DGM                      | NaCF <sub>3</sub> SO <sub>3</sub> | 0.2                   | DGM     | 1                      |
| 0.2-TGM                      | NaCF <sub>3</sub> SO <sub>3</sub> | 0.2                   | TGM     | 1                      |

**Table S2.** Fitting data of components in the equivalent circuit.

|          | R <sub>s</sub> (Ω) | R <sub>ct</sub> (Ω) | R <sub>f</sub> (Ω) |
|----------|--------------------|---------------------|--------------------|
| 0.2-Melm | 8.3                | 7.2                 | 6.8                |
| 0.2-DGM  | 11.4               | 17.0                | 16.7               |

**Table S3.** Fitting data of the NMR of 0.2-DGM before cycling and after 128 cycles.

|                   | $S_{\text{DMSO}}$ | $S_1 / S_{\text{DMSO}}$ | $S_2 / S_{\text{DMSO}}$ | $S_3 / S_{\text{DMSO}}$ |
|-------------------|-------------------|-------------------------|-------------------------|-------------------------|
| Pristine          | 3521.18           | 0.587                   | 0.594                   | 0.503                   |
| 128 <sup>th</sup> | 3305.35           | 0.638                   | 0.636                   | 0.546                   |

## References

- 1 W. Mao, S. Zhang, F. Cao, J. Pan, Y. Ding, C. Ma, M. Li, Z. Hou, K. Bao, and Y. Qian, *J. Alloys Compd.* 2020, **842**, 155300.
- 2 A. D. Becke, *J. Chem. Phys.* 1992, **97**, 9173-9177.
- 3 S. Grimme, S. Ehrlich, and L. Goerigk, *J. Comput. Chem.* 2011, **32**, 1456-1465.
- 4 Z. Tian, Y. Zou, G. Liu, Y. Wang, J. Yin, J. Ming, and H. N. Alshareef, *Adv. Sci.* 2022, **9**, 2201207.
